# Supplementary material for: A-to-I miR-378a-3p editing can prevent melanoma progression via regulation of PARVA expression
Source: PubMed Central journal article supplement (PMC5792646; doi:10.1038/s41467-018-02851-7), 2018-01-31
Supplement: 41467_2018_2851_MOESM3_ESM.pdf [file 41467_2018_2851_MOESM3_ESM.pdf]

## **Description of Additional Supplementary Files**

File Name: Supplementary Data 1

Description: Differential gene expression (Log-ratio 0.5,  $p < 0.01$ ) using Nexus expression 3.
