# Supplementary material for: A-to-I miR-378a-3p editing can prevent melanoma progression via regulation of PARVA expression
Source: PubMed Central journal article supplement (PMC5792646; doi:10.1038/s41467-018-02851-7), 2018-01-31
Supplement: 41467_2018_2851_MOESM4_ESM.pdf [file 41467_2018_2851_MOESM4_ESM.pdf]

## Supplementary Data 1. Differential gene expression (Log-ratio 0.5, p<0.01) using Nexus expression 3

Comparison 1 - Groups - <Edited> vs. Avg of <Mimic> (175:131)

#Log-Ratio Threshold - 0.5

#P-Value Threshold - 0.01

#Multiple Test Correction - None

| Probe              | Gene Symbol  | regulation  | log-ratio      | p-value       | Probe        | Gene Symbol | regulation | log-ratio | p-value |
|--------------------|--------------|-------------|----------------|---------------|--------------|-------------|------------|-----------|---------|
| 1553055_a_at       | SLFN5        | DOWN        | -0.7591        | 0.0005        | 1553603_s_at | ARL6IP2     | UP         | 0.6592    | 0.0012  |
| 1559883_s_at       | SAMHD1       | DOWN        | -1.0074        | 0.0002        | 1554020_at   | BICD1       | UP         | 0.631     | 0.0015  |
| 1568592_at         | TRIM69       | DOWN        | -0.5875        | 0.0028        | 1559006_at   |             | UP         | 0.6911    | 0.0059  |
| 200887_s_at        | STAT1        | DOWN        | -0.7222        | 0.0011        | 200998_s_at  | CKAP4       | UP         | 0.5401    | 0.0012  |
| 201469_s_at        | SHC1         | DOWN        | -0.5685        | 0.0024        | 201677_at    | C3orf37     | UP         | 0.6334    | 0.0088  |
| 201502_s_at        | NFKBIA       | DOWN        | -0.518         | 0.0002        | 201710_at    | MYBL2       | UP         | 0.567     | 0.0029  |
| 201601_x_at        | IFITM1       | DOWN        | -1.21          | 0.0015        | 201896_s_at  | PSRC1       | UP         | 0.5486    | 0.0038  |
| 201649_at          | UBE2L6       | DOWN        | -0.7147        | 0.0019        | 202084_s_at  | SEC14L1     | UP         | 0.5351    | 0.0066  |
| 201708_s_at        | NIPSNAP1     | DOWN        | -0.5133        | 0.0037        | 202094_at    | BIRC5       | UP         | 0.5767    | 0.0012  |
| 202145_at          | LY6E         | DOWN        | -0.5289        | 0.0008        | 202743_at    | PIK3R3      | UP         | 0.5435    | 0.0078  |
| 202217_at          | C21orf33     | DOWN        | -1.1039        | 0.0001        | 203284_s_at  | HS2ST1      | UP         | 0.517     | 0.0088  |
| 202411_at          | IFI27        | DOWN        | -2.2919        | 0.0001        | 203537_at    | PRPSAP2     | UP         | 0.5147    | 0.0083  |
| 202430_s_at        | PLSCR1       | DOWN        | -0.74          | 0.0021        | 204727_at    | WDHD1       | UP         | 0.6168    | 0.0039  |
| 202446_s_at        | PLSCR1       | DOWN        | -0.6745        | 0.0005        | 204728_s_at  | WDHD1       | UP         | 0.6438    | 0.0019  |
| 202638_s_at        | ICAM1        | DOWN        | -0.588         | 0.0035        | 205474_at    | CRLF3       | UP         | 1.0463    | 0.003   |
| 202663_at          | WIPF1        | DOWN        | -0.6412        | 0.0021        | 211814_s_at  | CCNE2       | UP         | 0.5317    | 0.0008  |
| 202869_at          | OAS1         | DOWN        | -1.9323        | 0.0009        | 212836_at    | POLD3       | UP         | 0.5132    | 0.0011  |
| 203147_s_at        | TRIM14       | DOWN        | -0.5115        | 0.0005        | 213032_at    | NFIB        | UP         | 0.6456    | 0.0075  |
| 203153_at          | IFIT1        | DOWN        | -1.5449        | 0.0012        | 214820_at    | BRWD1       | UP         | 0.752     | 0.0089  |
| 203882_at          | ISGF3G       | DOWN        | -0.8991        | 0.0003        | 218031_s_at  | FOXN3       | UP         | 0.5755    | 0.0046  |
| 203974_at          | HDHD1A       | DOWN        | -0.8698        | 0.0069        | 219226_at    | CRKRS       | UP         | 0.7015    | 0.0004  |
| 204211_x_at        | EIF2AK2      | DOWN        | -0.5922        | 0.0074        | 219531_at    | CEP72       | UP         | 0.6715    | 0.0082  |
| 204415_at          | IFI6         | DOWN        | -2.0997        | 0.0001        | 221488_s_at  | CUTA        | UP         | 0.5648    | 0.0001  |
| 204439_at          | IFI44L       | DOWN        | -1.6436        | 0.0013        | 222734_at    | WARS2       | UP         | 0.5016    | 0.0083  |
| 204470_at          | CXCL1        | DOWN        | -0.5737        | 0.0009        | 223214_s_at  | ZHX1        | UP         | 0.5579    | 0.0014  |
| 204502_at          | SAMHD1       | DOWN        | -1.0912        | 0.0024        | 223595_at    | TMEM133     | UP         | 0.5726    | 0.005   |
| 204698_at          | ISG20        | DOWN        | -0.7921        | 0.0031        | 224521_s_at  | CCDC77      | UP         | 0.5078    | 0.01    |
| 204747_at          | IFIT3        | DOWN        | -1.2083        | 0.0006        | 225205_at    | KIF3B       | UP         | 0.8722    | 0.0014  |
| 204909_at          | DDX6         | DOWN        | -0.5427        | 0.0005        | 226265_at    | QSER1       | UP         | 0.6188    | 0.0013  |
| 204972_at          | OAS2         | DOWN        | -1.6041        | 0.007         | 226413_at    | LOC400027   | UP         | 0.549     | 0.0085  |
| 205067_at          | IL1B         | DOWN        | -0.5978        | 0.0071        | 226829_at    | AFAP1L2     | UP         | 0.6103    | 0.0025  |
| 205100_at          | GFPT2        | DOWN        | -1.2487        | 0.0002        | 227395_at    |             | UP         | 0.698     | 0.0019  |
| 205483_s_at        | ISG15        | DOWN        | -1.389         | 0.0002        | 228416_at    | ACVR2A      | UP         | 0.5069    | 0.0055  |
| 205552_s_at        | OAS1         | DOWN        | -2.5763        | 0             | 228920_at    | ZNF260      | UP         | 0.5804    | 0.0039  |
| 205660_at          | OASL         | DOWN        | -1.5254        | 0.0003        | 229114_at    |             | UP         | 0.5482    | 0.0087  |
| 206133_at          | XAF1         | DOWN        | -1.1211        | 0.0017        | 229134_at    | VANGL1      | UP         | 0.5197    | 0.0047  |
| 208012_x_at        | SP110        | DOWN        | -0.9544        | 0.0014        | 229492_at    | VANGL1      | UP         | 0.6173    | 0.0084  |
| 208436_s_at        | IRF7         | DOWN        | -1.2089        | 0.0028        | 229544_at    |             | UP         | 0.5081    | 0.0055  |
| 208965_s_at        | IFI16        | DOWN        | -0.5412        | 0.0006        | 229674_at    | SERTAD4     | UP         | 0.5092    | 0.0036  |
| 208996_s_at        | POLR2C       | DOWN        | -0.5136        | 0.0001        | 230097_at    | GART        | UP         | 0.5421    | 0.0039  |
| 209417_s_at        | IFI35        | DOWN        | -0.9711        | 0.0026        | 230201_at    |             | UP         | 0.5969    | 0.0047  |
| 209518_at          | SMARCD1      | DOWN        | -0.7969        | 0.0044        | 231975_s_at  | MIER3       | UP         | 0.54      | 0.0087  |
| 209761_s_at        | SP110        | DOWN        | -1.2139        | 0.0017        | 232291_at    | MIRH1       | UP         | 0.6624    | 0.0062  |
| 209762_x_at        | SP110        | DOWN        | -1.2253        | 0.0006        | 235470_at    |             | UP         | 0.6173    | 0.0049  |
| 209774_x_at        | CXCL2        | DOWN        | -0.5867        | 0.0003        | 236219_at    | TMEM20      | UP         | 0.9916    | 0.0089  |
| 209852_x_at        | PSME3        | DOWN        | -0.7006        | 0             | 237400_at    | ATP5S       | UP         | 0.5045    | 0.0016  |
| 209906_at          | C3AR1        | DOWN        | -0.5019        | 0.0003        | 239944_at    | NAIP        | UP         | 0.5664    | 0.0034  |
| 209969_s_at        | STAT1        | DOWN        | -1.294         | 0.0012        | 242245_at    |             | UP         | 0.5056    | 0.0048  |
| 210667_s_at        | C21orf33     | DOWN        | -1.3287        | 0.0003        | 243852_at    | LUC7L2      | UP         | 0.5268    | 0.0036  |
| 210797_s_at        | OASL         | DOWN        | -1.2505        | 0.0017        | 244563_at    | QSER1       | UP         | 0.9039    | 0       |
| 211506_s_at        | IL8          | DOWN        | -0.6532        | 0.0008        |              |             |            |           |         |
| 212203_x_at        | IFITM3       | DOWN        | -0.5534        | 0.0003        |              |             |            |           |         |
| 213015_at          |              | DOWN        | -0.6788        | 0.0038        |              |             |            |           |         |
| 213043_s_at        | MED24        | DOWN        | -0.8127        | 0.0007        |              |             |            |           |         |
| 213797_at          | RSAD2        | DOWN        | -1.7779        | 0.0033        |              |             |            |           |         |
| 214022_s_at        | IFITM1       | DOWN        | -1.7257        | 0.0003        |              |             |            |           |         |
| 214290_s_at        | HIST2H2AA3   | DOWN        | -0.6336        | 0.005         |              |             |            |           |         |
| 214374_s_at        | PPFIBP1      | DOWN        | -0.55          | 0.009         |              |             |            |           |         |
| 214453_s_at        | IFI44        | DOWN        | -0.7456        | 0.0006        |              |             |            |           |         |
| 215247_at          | LOC440895    | DOWN        | -0.5432        | 0.0018        |              |             |            |           |         |
| 215411_s_at        | TRAF3IP2     | DOWN        | -1.1286        | 0.0005        |              |             |            |           |         |
| 216565_x_at        | LOC391020    | DOWN        | -0.6618        | 0.0004        |              |             |            |           |         |
| 217502_at          | IFIT2        | DOWN        | -0.7109        | 0.0024        |              |             |            |           |         |
| 217839_at          | TFG          | DOWN        | -0.9163        | 0             |              |             |            |           |         |
| <b>217890_s_at</b> | <b>PARVA</b> | <b>DOWN</b> | <b>-1.3902</b> | <b>0.0001</b> |              |             |            |           |         |
| 218145_at          | TRIB3        | DOWN        | -0.6652        | 0.0063        |              |             |            |           |         |
| 218400_at          | OAS3         | DOWN        | -1.2565        | 0.0027        |              |             |            |           |         |

|                      |              |             |                |               |
|----------------------|--------------|-------------|----------------|---------------|
| 218699_at            | RAB7L1       | DOWN        | -0.6547        | 0.005         |
| 218915_at            | NF2          | DOWN        | -1.2066        | 0             |
| 218943_s_at          | DDX58        | DOWN        | -1.1235        | 0.0005        |
| 218984_at            | PUS7         | DOWN        | -0.5209        | 0.0016        |
| 219209_at            | IFIH1        | DOWN        | -1.1848        | 0.0066        |
| 219352_at            | HERC6        | DOWN        | -1.446         | 0.0016        |
| 219863_at            | HERC5        | DOWN        | -0.6024        | 0.0009        |
| 221735_at            | WDR48        | DOWN        | -0.9761        | 0.0011        |
| 221766_s_at          | FAM46A       | DOWN        | -0.637         | 0.0003        |
| <b>222455_s_at</b>   | <b>PARVA</b> | <b>DOWN</b> | <b>-0.8465</b> | <b>0.0009</b> |
| 222793_at            | DDX58        | DOWN        | -0.9199        | 0.0029        |
| 222907_x_at          | TMEM50B      | DOWN        | -0.5044        | 0.0012        |
| 222995_s_at          | RHBDD2       | DOWN        | -0.7959        | 0.0001        |
| 223218_s_at          | NFKBIZ       | DOWN        | -0.6616        | 0.0066        |
| 223220_s_at          | PARP9        | DOWN        | -1.334         | 0.0001        |
| 223266_at            | ALS2CR2      | DOWN        | -0.559         | 0             |
| 223849_s_at          | MOV10        | DOWN        | -0.7087        | 0.0033        |
| 223888_s_at          | LARS         | DOWN        | -0.5981        | 0.002         |
| 224354_at            |              | DOWN        | -0.9174        | 0.0061        |
| 224559_at            | MALAT1       | DOWN        | -1.936         | 0.0091        |
| 224851_at            | CDK6         | DOWN        | -0.7364        | 0.0043        |
| 225188_at            | RAPH1        | DOWN        | -0.6108        | 0.0004        |
| 225189_s_at          | RAPH1        | DOWN        | -0.5718        | 0.0016        |
| 225415_at            | DTX3L        | DOWN        | -0.5861        | 0             |
| 225616_at            | SPRYD4       | DOWN        | -0.6495        | 0.0007        |
| 225636_at            | STAT2        | DOWN        | -0.5688        | 0.0022        |
| 225804_at            | CYB5D2       | DOWN        | -0.5698        | 0.0011        |
| 226603_at            | SAMD9L       | DOWN        | -1.0852        | 0.0018        |
| 226702_at            | LOC129607    | DOWN        | -1.5109        | 0.001         |
| 226734_at            | EIF4E2       | DOWN        | -0.6104        | 0.0014        |
| 226757_at            | IFIT2        | DOWN        | -0.5948        | 0.0048        |
| 227309_at            | YOD1         | DOWN        | -1.004         | 0.0001        |
| 227807_at            | PARP9        | DOWN        | -0.6825        | 0.0006        |
| 228152_s_at          | FLJ31033     | DOWN        | -0.6423        | 0.0076        |
| 228230_at            | PRIC285      | DOWN        | -0.681         | 0.0066        |
| 228607_at            | OAS2         | DOWN        | -1.5804        | 0.0038        |
| 228617_at            | XAF1         | DOWN        | -0.9418        | 0.0058        |
| 229450_at            | IFIT3        | DOWN        | -0.9982        | 0.0003        |
| 230314_at            |              | DOWN        | -0.9081        | 0.0001        |
| 231835_at            | C1orf93      | DOWN        | -0.5528        | 0.0005        |
| 233917_s_at          | MOV10        | DOWN        | -0.606         | 0.0041        |
| 234987_at            |              | DOWN        | -0.975         | 0.0016        |
| 235529_x_at          |              | DOWN        | -0.9286        | 0.0004        |
| 235643_at            | SAMD9L       | DOWN        | -0.6179        | 0.0095        |
| 235964_x_at          |              | DOWN        | -0.8344        | 0.0001        |
| 239038_at            | C1orf52      | DOWN        | -0.7141        | 0.0006        |
| 242625_at            | RSAD2        | DOWN        | -2.1558        | 0.001         |
| 242961_x_at          | DDX58        | DOWN        | -0.8805        | 0.0032        |
| 243271_at            |              | DOWN        | -0.606         | 0.0001        |
| 244881_at            | LMLN         | DOWN        | -0.6793        | 0.0055        |
| 39402_at             | IL1B         | DOWN        | -0.5434        | 0.0096        |
| 52164_at             | C11orf24     | DOWN        | -0.5662        | 0.0014        |
| 53720_at             | FLJ11286     | DOWN        | -0.5103        | 0.0008        |
| 56919_at             | WDR48        | DOWN        | -0.7701        | 0.0002        |
| AFFX-<br>HUMISGF3A/M |              |             |                |               |
| 97935_3_at           | STAT1        | DOWN        | -0.7796        | 0.0024        |
| AFFX-<br>HUMISGF3A/M |              |             |                |               |
| 97935_5_at           | STAT1        | DOWN        | -1.2691        | 0.0007        |
| AFFX-<br>HUMISGF3A/M |              |             |                |               |
| 97935_MA_at          | STAT1        | DOWN        | -1.1665        | 0.0001        |
| AFFX-<br>HUMISGF3A/M |              |             |                |               |
| 97935_MB_at          | STAT1        | DOWN        | -0.8872        | 0.002         |
